# Supplementary material
Source: PubMed Central journal article supplement (PMC7978153)
Supplement: NIHMS1648854-supplement-1.pdf [file NIHMS1648854-supplement-1.pdf]

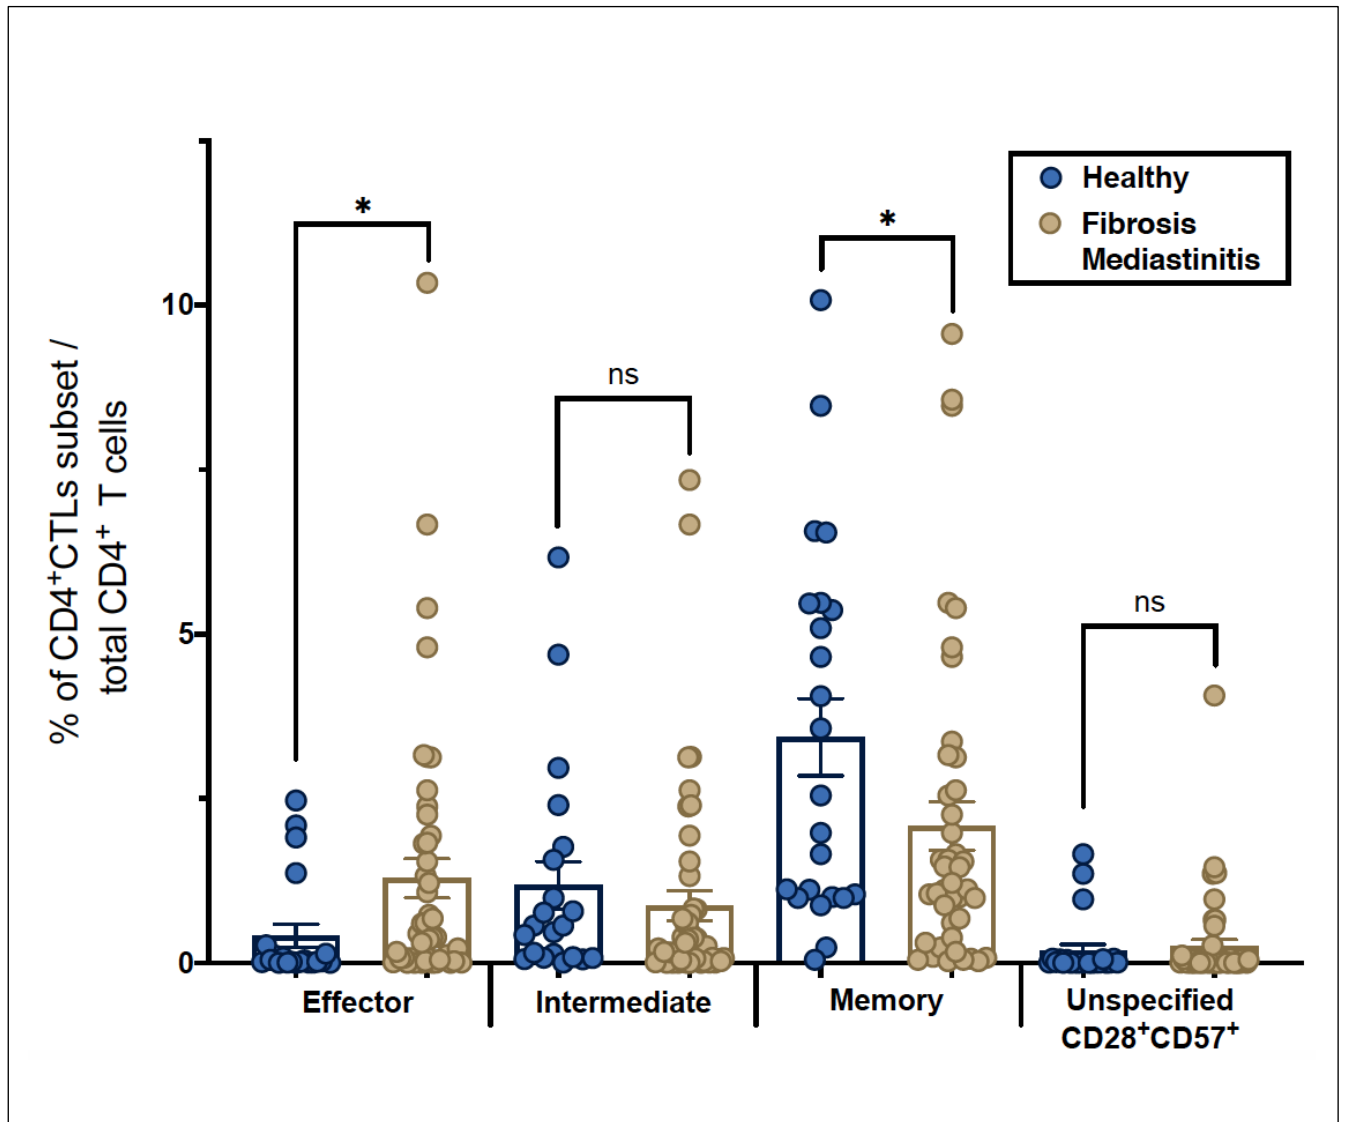

**Supplemental Figure 1. The effector subset of CD4+CTLs is expanded in fibrosing mediastinitis while the memory subset contracts.** Flow cytometry gating strategy to identify effector CD4+CTLs (CD4+CD45Ro+CD27-SLAMF7+CD28loCD57hi), memory CD4+CTLs (CD4+CD45Ro+CD27-SLAMF7+CD28hiCD57lo), intermediate CD4+CTLs (CD4+CD45Ro+CD27-SLAMF7+CD28loCD57o), and unspecified CD4+CTLs (CD4+CD45Ro+CD27-SLAMF7+CD28hiCD57hi). Quantified as % of total CD4+ T cells and expressed as means +/- SE (Control n=21, FM n= 47). \*P<0.05 by two-tailed Mann-Whitney t-test.

**Supplemental table 1.** Demographics of patients on whom flow cytometry analyses were performed

|                                   | <b>African American</b> | <b>Caucasian</b>     | <b>p Value</b> |
|-----------------------------------|-------------------------|----------------------|----------------|
| <b>n</b>                          | <b>9</b>                | <b>38</b>            |                |
| <b>Age (mean (SD))</b>            | <b>38.56 (13.88)</b>    | <b>40.87 (11.36)</b> | <b>0.601</b>   |
| <b>Vessel (%)</b>                 |                         |                      | <b>0.806</b>   |
| <b>Left pulmonary artery</b>      | <b>1 (11.1)</b>         | <b>2 ( 5.3)</b>      |                |
| <b>Mixte</b>                      | <b>5 (55.6)</b>         | <b>19 (50.0)</b>     |                |
| <b>Right pulmonary artery</b>     | <b>2 (22.2)</b>         | <b>8 (21.1)</b>      |                |
| <b>Superior veina cava</b>        | <b>1 (11.1)</b>         | <b>9 (23.7)</b>      |                |
| <b>Stented = Yes (%)</b>          | <b>3 (33.3)</b>         | <b>10 (26.3)</b>     | <b>0.993</b>   |
| <b>Gender = Male (%)</b>          | <b>4 (44.4)</b>         | <b>21 (55.3)</b>     | <b>0.831</b>   |
| <b>H. Capsulatum serology (%)</b> |                         |                      | <b>0.931</b>   |
| <b>Negative</b>                   | <b>4 (44.4)</b>         | <b>16 (42.1)</b>     |                |
| <b>Positive</b>                   | <b>4 (44.4)</b>         | <b>19 (50.0)</b>     |                |
| <b>Unknown</b>                    | <b>1 (11.1)</b>         | <b>3 ( 7.9)</b>      |                |

**Supplemental table 2.** Breakdown of the demographics of patients analyzed for T cell repertoire, tissue immunofluorescence and antigenic stimulation

|                                                              | Age | Gender | <i>H. Capsulatum</i> serology |
|--------------------------------------------------------------|-----|--------|-------------------------------|
| <b>T cell repertoire analysis (Figure 2.)</b>                | 37  | M      | -                             |
|                                                              | 33  | M      | Not done                      |
|                                                              | 28  | F      | +                             |
|                                                              | 18  | M      | -                             |
|                                                              | 25  | M      | -                             |
| <b>Tissue Immunofluorescence (Figure 3)</b>                  | 41  | F      | -                             |
|                                                              | 20  | F      | -                             |
|                                                              | 42  | F      | +                             |
|                                                              | 51  | F      | +                             |
| <b><i>H. Capsulatum</i> antigenic stimulation (Figure 4)</b> | 36  | M      | -                             |
|                                                              | 45  | F      | -                             |
|                                                              | 25  | F      | +                             |
|                                                              | 22  | M      | +                             |
|                                                              | 30  | F      | +                             |

Supplemental Table 3. TCR Sequence distribution for a representative patient included in Figure 2.

| Patient #1                      |                      |                        |
|---------------------------------|----------------------|------------------------|
| CD4+CTLs subsets                | TCR $\beta$ Sequence | % of total pool of TCR |
| CD57+CD28-<br>(Effector)        | CASSRDSNQPQHF        | 82.71                  |
|                                 | CASSPPGDRIKKTQYF     | 4.32                   |
|                                 | CASSPPAGGSGMDQPQHF   | 1.78                   |
|                                 | CASSISYGYTF          | 1.76                   |
|                                 | CASSRGLAGGYNEQFF     | 0.98                   |
|                                 | Total :              | 91.54                  |
|                                 | CASSPPGDRIKKTQYF     | 4.17                   |
| CD57+CD28+<br>(Unspecified)     | CASSFPQGQHLDQETQYF   | 2.08                   |
|                                 | CASSISYGYTF          | 1.56                   |
|                                 | CASSLAGGPETQYF       | 1.04                   |
|                                 | CASSSVTEAFF          | 1.04                   |
|                                 | Total :              | 9.90                   |
|                                 | CASRYGAGGSIGEQFF     | 2.73                   |
| CD57-CD28+<br>(Memory CD4+CTLs) | CASSPPGDRIKKTQYF     | 1.82                   |
|                                 | CASSPGRVSGANVLTF     | 1.82                   |
|                                 | CASSHGGTSFYNEQFF     | 0.91                   |
|                                 | CASSQVGRGGLTEAFF     | 0.91                   |
|                                 | Total :              | 8.18                   |
|                                 | CASSRDSNQPQHF        | 2.38                   |
|                                 | CASSFPQGQHLDQETQYF   | 1.59                   |
| CD57-CD28-<br>(Intermediate)    | CASSLEASGELFF        | 1.59                   |
|                                 | CASSAQYTEAFF         | 1.59                   |
|                                 | CASSLAVNTEAFF        | 1.59                   |
|                                 | CASSLAVNTEAFF        | 1.59                   |
